# Supplementary material for: Analytical evidence of enamel hypomineralisation on permanent and primary molars amongst past populations
Source: PubMed Central journal article supplement (PMC5431767; doi:10.1038/s41598-017-01745-w), 2017-05-10
Supplement: 41598_2017_1745_MOESM1_ESM.pdf [file 41598_2017_1745_MOESM1_ESM.pdf]

Analytical evidence of enamel hypomineralisation on permanent and primary molars amongst past populations

Elsa Garot<sup>\*a,b</sup>, Christine Couture-Veschambre<sup>b</sup>, David Manton<sup>c</sup>, Cédric Beauval<sup>d</sup>, Patrick Rouas<sup>a,b</sup>

<sup>a</sup>Univ. de Bordeaux, UFR des Sciences Odontologiques, Bordeaux, France

<sup>b</sup>Univ. de Bordeaux, PACEA, UMR 5199, Pessac, France

<sup>c</sup>Melbourne Dental School, University of Melbourne, Victoria, Australia

<sup>d</sup>Archéosphère, 2 Rue des Noyers, 11500 Quirbajou, France

\*Corresponding author

Correspondence to [elsa.garot@u-bordeaux.fr](mailto:elsa.garot@u-bordeaux.fr),

**Supplementary Table 1. Details of MIH specialists' responses for each specimen (a) and kappa Fleiss' test performed between responses (B335, S323 and S407) to test agreement degree on clinical diagnosis of MIH.**

| a) | B335   | S323   | S407   |
|----|--------|--------|--------|
| 1  | Yes    | Yes    | Yes    |
| 2  | Unsure | Unsure | Unsure |
| 3  | Unsure | Unsure | Yes    |
| 4  | Yes    | Yes    | Yes    |
| 5  | Yes    | No     | Yes    |
| 6  | Yes    | No     | Yes    |
| 7  | Yes    | Yes    | Yes    |
| 8  | Yes    | Yes    | Yes    |
| 9  | No     | Unsure | Unsure |
| 10 | Unsure | Yes    | Yes    |
| 11 | Yes    | Yes    | Yes    |
| 12 | Yes    | No     | Yes    |
| 13 | Yes    | Yes    | Unsure |
| 14 | Unsure | No     | No     |
| 15 | Yes    | Unsure | Yes    |
| 16 | Yes    | Unsure | Yes    |
| 17 | Unsure | No     | Yes    |
| 18 | Unsure | Unsure | No     |
| 19 | Unsure | Yes    | Yes    |

| b) | Cases        | Yes    | No    | Unsure | Total   | Fleiss's $\kappa$ |
|----|--------------|--------|-------|--------|---------|-------------------|
|    | B335 (n ; %) | 11; 58 | 1; 5  | 7; 37  | 19; 100 | <0                |
|    | S323 (n ; %) | 8; 42  | 5; 26 | 6; 32  | 19; 100 | <0                |
|    | S407 (n ; %) | 14; 74 | 2; 11 | 3; 16  | 19; 100 | <0                |
|    |              |        |       |        |         | 0.0052            |

**Supplementary Table 2. 3D data and mineral densities determined by microcomputed tomography analyses.** GL, Grey level ; **1**, enamel surface; **2**, midway between 1 and 3; **3**, midway between 1 and 5; **4** midway between 3 and 5; **5**, enamel dentin junction; m, mean; SD, standard deviation; mdd, mineral density difference.

| Tooth        | Area               | Analyse 1<br>(GL) |                 |                 |                 |                 | Analyse 2<br>(GL) |                 |                 |                 |                 |
|--------------|--------------------|-------------------|-----------------|-----------------|-----------------|-----------------|-------------------|-----------------|-----------------|-----------------|-----------------|
|              |                    | <b>1</b>          | <b>2</b>        | <b>3</b>        | <b>4</b>        | <b>5</b>        | <b>1</b>          | <b>2</b>        | <b>3</b>        | <b>4</b>        | <b>5</b>        |
| B335(46)     | Discoloured        | 51143.27          | 46627.82        | 48078.45        | 47143.20        | 45922.02        | 48946.15          | 48137.52        | 47196.66        | 47089.55        | 44734.33        |
| B335(16)     | Discoloured        | 50349.05          | 46191.46        | 45172.16        | 44127.30        | 44138.89        | 49943.82          | 46755.06        | 45488.54        | 45205.63        | 43427.42        |
| S323(55)     | Discoloured        | 52301.95          | 45768.67        | 45644.54        | 48178.66        | 47140.19        | 53878.00          | 45673.71        | 44778.18        | 46429.14        | 44958.87        |
| S323(65)     | Discoloured        | 53641.84          | 51449.97        | 46978.83        | 44769.32        | 46038.72        | 52921.17          | 50063.78        | 43944.25        | 42697.41        | 44868.25        |
| S323(75)     | Discoloured        | 54060.75          | 46491.25        | 44529.52        | 45572.43        | 45495.46        | 53074.51          | 47340.52        | 41624.81        | 44032.04        | 47811.14        |
| S323(85)     | Discoloured        | 52388.45          | 45564.59        | 42210.57        | 43609.63        | 45531.71        | 53753.18          | 50000.20        | 46371.78        | 46057.32        | 46204.30        |
| S323(11)     | Discoloured        | 49422.32          | 50499.43        | 51257.05        | 51957.19        | 51568.27        | 57626.29          | 52170.31        | 51733.62        | 51671.83        | 50858.36        |
| S323(26)     | Discoloured        | 53814.66          | 47308.77        | 44984.29        | 43182.63        | 43718.72        | 53212.95          | 44836.43        | 42338.43        | 43380.83        | 43658.92        |
| S407(26)     | Discoloured        | 47619.87          | 43435.07        | 46151.47        | 45960.82        | 45248.82        | 48125.11          | 43589.09        | 46336.70        | 45874.63        | 43745.10        |
| <b>m</b>     | <b>Discoloured</b> | <b>51638.02</b>   | <b>47037.45</b> | <b>46111.88</b> | <b>46055.69</b> | <b>46089.20</b> | <b>52386.80</b>   | <b>47618.51</b> | <b>45534.77</b> | <b>45826.49</b> | <b>45585.19</b> |
| <i>SD</i>    | <i>Discoloured</i> | <i>2196.24</i>    | <i>2486.65</i>  | <i>2529.58</i>  | <i>2747.07</i>  | <i>2289.86</i>  | <i>2935.82</i>    | <i>2766.34</i>  | <i>2982.03</i>  | <i>2635.34</i>  | <i>2411.62</i>  |
| B335(46)     | Normal             | 55224.77          | 51081.28        | 49531.41        | 47883.66        | 45564.79        | 55983.70          | 52668.33        | 51519.46        | 49932.82        | 47129.98        |
| B335(16)     | Normal             | 54420.50          | 50139.23        | 48509.47        | 46727.19        | 46438.95        | 50294.45          | 48213.03        | 46851.20        | 46099.88        | 45594.21        |
| S323(55)     | Normal             | 54401.00          | 51567.79        | 49572.19        | 48696.99        | 48715.41        | 54449.14          | 51377.32        | 48938.70        | 48140.23        | 47549.47        |
| S323(65)     | Normal             | 54998.55          | 53102.39        | 51691.18        | 50562.35        | 49703.87        | 54461.06          | 50326.05        | 48163.60        | 47870.34        | 46747.41        |
| S323(75)     | Normal             | 54477.51          | 50291.41        | 48157.63        | 48040.41        | 47018.32        | 55403.86          | 50801.39        | 47635.05        | 46584.65        | 45985.59        |
| S323(85)     | Normal             | 54247.43          | 50121.52        | 48318.83        | 48591.45        | 48125.59        | 55476.08          | 50475.83        | 47941.99        | 47856.75        | 47575.47        |
| S323(11)     | Normal             | 50481.35          | 51328.84        | 51013.67        | 50577.61        | 49940.02        | 50747.20          | 51609.20        | 51206.11        | 50757.74        | 50074.84        |
| S323(26)     | Normal             | 53874.34          | 49637.61        | 47623.47        | 45736.30        | 44731.47        | 54864.59          | 51009.50        | 49631.85        | 48992.71        | 46970.84        |
| S407(26)     | Normal             | 53000.55          | 51322.56        | 50579.72        | 49338.69        | 47569.98        | 52519.87          | 50544.39        | 49721.64        | 48964.37        | 46876.59        |
| B335(26)     | Normal             | 55307.95          | 50779.75        | 48752.82        | 47588.50        | 45845.44        | 53644.93          | 50154.45        | 49179.53        | 48241.74        | 46026.47        |
| B335(26)     | Normal             | 54577.41          | 50581.55        | 49199.96        | 48364.82        | 45461.69        | 53816.46          | 49991.64        | 48366.35        | 47658.84        | 45534.35        |
| S323(16)     | Normal             | 54739.91          | 51240.03        | 49727.11        | 48258.73        | 45842.09        | 52812.76          | 49755.30        | 48030.42        | 47080.08        | 46452.01        |
| S323(16)     | Normal             | 53710.98          | 50517.12        | 49179.14        | 47960.49        | 45975.82        | 54076.75          | 51078.34        | 49214.39        | 48399.53        | 46574.69        |
| S323(21)     | Normal             | 56283.36          | 53635.29        | 51755.77        | 50826.96        | 49770.09        | 52889.20          | 51829.55        | 50979.10        | 50442.19        | 49787.56        |
| S323(21)     | Normal             | 56220.79          | 53853.04        | 52350.04        | 51481.92        | 49537.88        | 52169.61          | 51122.83        | 50803.54        | 49904.56        | 50153.93        |
| <b>m</b>     | <b>Normal</b>      | <b>54397.76</b>   | <b>51279.96</b> | <b>49730.83</b> | <b>48709.07</b> | <b>47349.43</b> | <b>53573.98</b>   | <b>50730.48</b> | <b>49212.20</b> | <b>48461.76</b> | <b>47268.89</b> |
| <i>SD</i>    | <i>Normal</i>      | <i>1387.89</i>    | <i>1288.84</i>  | <i>1443.68</i>  | <i>1593.33</i>  | <i>1820.17</i>  | <i>1673.02</i>    | <i>1033.06</i>  | <i>1423.07</i>  | <i>1375.84</i>  | <i>1544.58</i>  |
| mdd          |                    | 2759.74           | 4242.51         | 3618.95         | 2653.38         | 1260.23         | 1187.18           | 3111.96         | 3677.42         | 2635.28         | 1683.71         |
| mdd (%)      |                    | 5.1               | 8.3             | 7.3             | 5.4             | 2.7             | 2.2               | 6.1             | 7.5             | 5.4             | 3.6             |
| mdd mean (%) | Analyses 1&2       | <b>3.6</b>        | <b>7.2</b>      | <b>7.4</b>      | <b>5.4</b>      | <b>3.1</b>      |                   |                 |                 |                 |                 |

**Supplementary Figure 1. Selected coronal and sagittal slides provided by microcomputed tomography for 2D analyses of mineral densities line profiles by microcomputed tomography analyses. a, B335(46); b, B335(36); c, B335(16); d, S323(55); e, S323(85); f, S323(65); g, S323(75); h, S323(26); i, S323(16); j, S323(21); k, S407(26); ★ affected area.**

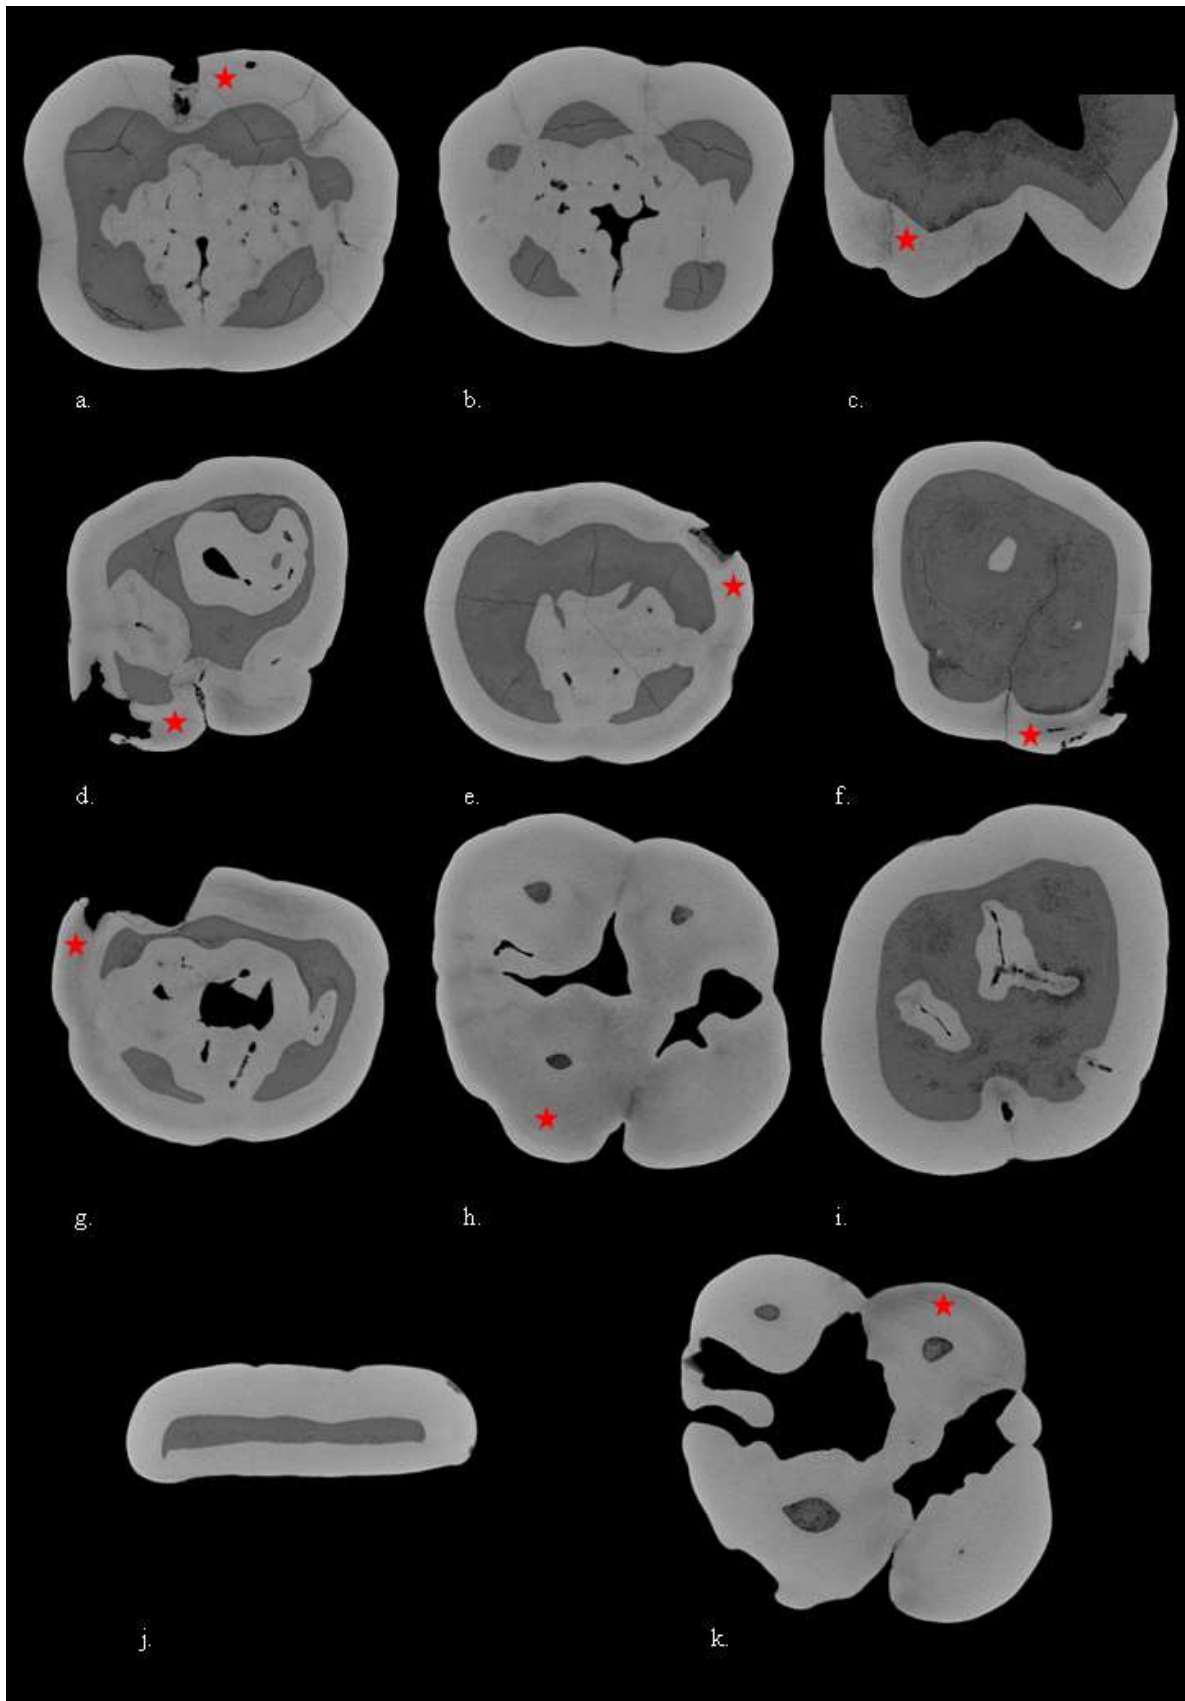

**Supplementary Table 3.2D data and line profiles of mineral densities from DEJ to surface (99 equidistant measurements) along the lines AB and CD from DEJ to surface (table 4b) provided by microcomputed tomography analyses. Normal enamel measurements come from control group (n = 3) and normal enamel of discoloured group (n = 8 with the exception of S323(11)). Discoloured enamel measurements come from discoloured enamel from discoloured group (n = 8 with exception of 321(11)). DEJ, Dento-Enamel Junction; GL, Grey level ; m, mean; SD, standard deviation; mdd, mineral density difference.**

| m normal (GL) | SD (GL) | m discoloured (GL) | SD (GL) | mdd (GL) | mdd (%) |
|---------------|---------|--------------------|---------|----------|---------|
| 46305.59      | 2949.20 | 44793.58           | 3728.48 | 1512.01  | 3.27    |
| 46300.70      | 3678.45 | 45414.27           | 3090.19 | 886.43   | 1.91    |
| 46023.30      | 3174.19 | 45472.40           | 2901.50 | 550.90   | 1.20    |
| 47098.10      | 2331.05 | 45727.00           | 2771.92 | 1371.10  | 2.91    |
| 46984.93      | 3838.21 | 46603.25           | 2850.31 | 381.68   | 0.81    |
| 47977.89      | 3145.46 | 46444.81           | 2465.67 | 1533.08  | 3.20    |
| 48285.67      | 2943.33 | 47504.89           | 2362.53 | 780.78   | 1.62    |
| 48713.22      | 3049.03 | 46951.91           | 4124.83 | 1761.31  | 3.62    |
| 47948.15      | 3924.97 | 44292.75           | 4370.03 | 3655.40  | 7.62    |
| 46750.56      | 3118.77 | 46428.32           | 5420.01 | 322.24   | 0.69    |
| 46619.36      | 3156.68 | 46322.40           | 3238.06 | 296.96   | 0.64    |
| 47155.99      | 2353.00 | 44764.80           | 2107.35 | 2391.19  | 5.07    |
| 47360.43      | 2885.50 | 44568.08           | 3592.90 | 2792.35  | 5.90    |
| 46688.63      | 2523.18 | 45930.27           | 4304.09 | 758.36   | 1.62    |
| 47021.86      | 3298.54 | 46339.14           | 2417.11 | 682.72   | 1.45    |
| 47424.73      | 2882.56 | 45277.43           | 2500.11 | 2147.30  | 4.53    |
| 50107.50      | 3326.52 | 45897.65           | 4435.63 | 4209.85  | 8.40    |
| 48207.74      | 2543.64 | 46967.90           | 3810.53 | 1239.84  | 2.57    |
| 46406.75      | 2573.35 | 47545.07           | 3191.60 | -1138.32 | -2.45   |
| 47840.10      | 2591.68 | 46071.03           | 2249.50 | 1769.07  | 3.70    |
| 47855.99      | 2960.26 | 47273.94           | 4271.48 | 582.05   | 1.22    |
| 47062.25      | 3955.59 | 47273.28           | 3743.90 | -211.03  | -0.45   |
| 47478.94      | 2766.23 | 46790.65           | 1741.28 | 688.29   | 1.45    |
| 47569.70      | 1968.96 | 44450.87           | 2532.60 | 3118.83  | 6.56    |
| 47842.86      | 3420.09 | 45656.04           | 2827.31 | 2186.82  | 4.57    |
| 47716.06      | 2052.54 | 45342.86           | 3464.51 | 2373.20  | 4.97    |
| 48109.47      | 2394.21 | 47267.59           | 1927.40 | 841.88   | 1.75    |
| 47178.75      | 3560.57 | 46561.33           | 4108.10 | 617.42   | 1.31    |
| 49472.29      | 2830.70 | 45184.63           | 3054.36 | 4287.66  | 8.67    |
| 48726.81      | 2920.78 | 44866.53           | 3228.93 | 3860.28  | 7.92    |
| 48999.19      | 2463.77 | 44527.21           | 5830.03 | 4471.98  | 9.13    |
| 47624.86      | 3031.62 | 46459.81           | 3133.36 | 1165.05  | 2.45    |
| 46649.97      | 2441.73 | 44374.37           | 3313.17 | 2275.60  | 4.88    |
| 48912.65      | 2385.31 | 45069.74           | 2333.31 | 3842.91  | 7.86    |
| 48409.41      | 3685.29 | 46663.51           | 3797.24 | 1745.90  | 3.61    |
| 46773.81      | 3982.12 | 43191.82           | 3381.26 | 3581.99  | 7.66    |
| 49039.11      | 2611.77 | 43036.96           | 4002.99 | 6002.15  | 12.24   |
| 48966.95      | 3296.41 | 43001.40           | 2626.29 | 5965.55  | 12.18   |

|          |         |          |         |         |       |
|----------|---------|----------|---------|---------|-------|
| 48683.84 | 2278.65 | 45936.03 | 3457.02 | 2747.81 | 5.64  |
| 48272.22 | 1861.41 | 46237.60 | 2778.10 | 2034.62 | 4.21  |
| 48590.60 | 3052.66 | 47695.76 | 3583.73 | 894.84  | 1.84  |
| 48379.47 | 2652.36 | 45288.49 | 5164.17 | 3090.98 | 6.39  |
| 49689.30 | 3505.14 | 46676.13 | 3103.02 | 3013.17 | 6.06  |
| 48910.98 | 2738.76 | 44167.07 | 3356.34 | 4743.91 | 9.70  |
| 48561.14 | 3320.12 | 45580.08 | 4064.15 | 2981.06 | 6.14  |
| 48045.73 | 2841.23 | 44635.93 | 2968.89 | 3409.80 | 7.10  |
| 47150.74 | 3914.17 | 46299.90 | 3030.25 | 850.84  | 1.80  |
| 48879.71 | 2726.25 | 44711.52 | 2819.89 | 4168.19 | 8.53  |
| 49272.73 | 2183.94 | 44643.62 | 3055.88 | 4629.11 | 9.39  |
| 48384.61 | 3334.05 | 44018.51 | 3766.92 | 4366.10 | 9.02  |
| 49426.87 | 2341.06 | 44770.20 | 3436.86 | 4656.67 | 9.42  |
| 49344.20 | 3465.74 | 43686.17 | 2473.80 | 5658.03 | 11.47 |
| 50017.35 | 2466.36 | 45057.49 | 1802.71 | 4959.86 | 9.92  |
| 49887.67 | 1543.04 | 44896.68 | 1298.82 | 4990.99 | 10.00 |
| 49358.23 | 1944.08 | 42587.12 | 3425.97 | 6771.11 | 13.72 |
| 47979.80 | 2548.72 | 44494.46 | 2160.93 | 3485.34 | 7.26  |
| 48708.17 | 3106.48 | 44875.43 | 3666.32 | 3832.74 | 7.87  |
| 50334.47 | 2043.82 | 44690.07 | 2231.16 | 5644.40 | 11.21 |
| 50244.19 | 2919.26 | 45193.60 | 3882.82 | 5050.59 | 10.05 |
| 49969.19 | 4105.61 | 46595.61 | 1236.49 | 3373.58 | 6.75  |
| 50410.27 | 2311.91 | 45973.71 | 3122.46 | 4436.56 | 8.80  |
| 50873.79 | 2345.98 | 45966.46 | 2256.51 | 4907.33 | 9.65  |
| 49879.13 | 2244.43 | 46195.57 | 3191.56 | 3683.56 | 7.38  |
| 49189.72 | 2503.64 | 46002.50 | 2207.97 | 3187.22 | 6.48  |
| 49704.71 | 3235.53 | 43189.09 | 2635.66 | 6515.62 | 13.11 |
| 48189.28 | 2907.80 | 46093.59 | 2015.52 | 2095.69 | 4.35  |
| 50198.80 | 3226.61 | 45171.58 | 2408.65 | 5027.22 | 10.01 |
| 50405.97 | 3210.33 | 46233.17 | 1739.42 | 4172.80 | 8.28  |
| 49734.63 | 3030.15 | 45504.12 | 2229.06 | 4230.51 | 8.51  |
| 50307.63 | 2601.35 | 43774.37 | 3335.70 | 6533.26 | 12.99 |
| 50702.88 | 2354.31 | 45063.82 | 1573.88 | 5639.06 | 11.12 |
| 51845.64 | 1718.68 | 46190.65 | 3253.01 | 5654.99 | 10.91 |
| 49761.31 | 4177.14 | 46639.51 | 3324.54 | 3121.80 | 6.27  |
| 52208.63 | 3237.08 | 45397.08 | 3987.63 | 6811.55 | 13.05 |
| 51580.43 | 2633.11 | 46675.40 | 2278.47 | 4905.03 | 9.51  |
| 50493.42 | 1259.54 | 46307.90 | 2771.29 | 4185.52 | 8.29  |
| 51709.14 | 3335.14 | 45671.55 | 4133.20 | 6037.59 | 11.68 |
| 50522.06 | 3228.79 | 47467.08 | 3410.43 | 3054.98 | 6.05  |
| 50568.04 | 2923.15 | 45753.39 | 2108.18 | 4814.65 | 9.52  |
| 51320.16 | 2027.32 | 47413.31 | 3283.21 | 3906.85 | 7.61  |
| 51616.88 | 2219.81 | 47220.20 | 2806.07 | 4396.68 | 8.52  |
| 53996.55 | 1997.42 | 48500.53 | 2465.95 | 5496.02 | 10.18 |

|          |         |          |         |         |       |
|----------|---------|----------|---------|---------|-------|
| 52805.04 | 2035.66 | 47570.71 | 4613.27 | 5234.33 | 9.91  |
| 52941.29 | 2523.70 | 47964.95 | 3275.31 | 4976.34 | 9.40  |
| 52803.45 | 4143.12 | 47564.50 | 2735.18 | 5238.95 | 9.92  |
| 52449.42 | 2821.94 | 48531.15 | 3313.10 | 3918.27 | 7.47  |
| 52754.22 | 3696.12 | 49864.67 | 3890.35 | 2889.55 | 5.48  |
| 52074.15 | 2560.10 | 48969.40 | 1964.72 | 3104.75 | 5.96  |
| 54011.19 | 2260.04 | 49673.25 | 2893.13 | 4337.94 | 8.03  |
| 52814.98 | 2216.16 | 49845.46 | 4901.38 | 2969.52 | 5.62  |
| 51690.69 | 2128.35 | 48713.33 | 2512.01 | 2977.36 | 5.76  |
| 52980.35 | 2736.04 | 48815.04 | 2759.49 | 4165.31 | 7.86  |
| 54407.13 | 3344.92 | 49179.68 | 3008.94 | 5227.45 | 9.61  |
| 54021.19 | 3431.26 | 50677.91 | 2935.49 | 3343.28 | 6.19  |
| 53754.72 | 2831.92 | 52489.12 | 1852.62 | 1265.60 | 2.35  |
| 54518.67 | 3377.55 | 50245.78 | 1183.53 | 4272.89 | 7.84  |
| 55136.10 | 2114.06 | 51499.27 | 2897.40 | 3636.83 | 6.60  |
| 55355.35 | 2651.18 | 53297.13 | 2786.68 | 2058.22 | 3.72  |
| 57038.04 | 2573.35 | 50816.02 | 4906.81 | 6222.02 | 10.91 |

## **Supplementary data. Archaeological information on series data**

### The convent “Les soeurs Grises”

In 1992, an exhaustive excavation of the site conducted by J.M. Fémolant helped uncover more than 350 burials and 50 ossuaries and collective burials. The convent was occupied by the religious community between 1480 and the late 18<sup>th</sup> century. From 1630, their main activity was child education entrusted by Beauvais families. In 1502, the community got to the convent the right to bury. The cemetery received his first relics the 20 August 1505.

### Sains-en-Gohelle

The cemetery would have been utilised for nearly a millennium from the late 7<sup>th</sup> century to the early 17<sup>th</sup> century. The buried individuals correspond to a parish population, even if funerary recruitment may change over time. The size of the cemetery (more than 1500 people on 1100 m<sup>2</sup> searched by two scientific teams) is very important in terms of archival data.

### **References**

Chevalier, N. *Le cimetière du couvent des Sœurs Grises de Beauvais de la fin du XVe au XVIIIe siècle, Étude des pratiques funéraires* DEA thesis, University of Bordeaux, (1993).

Beauval, C. *et al. Rapport d'opération de fouilles archéologiques Sains-en-Gohelle.* (2012).
